# Supplementary material for: In vitrostudies on the pharmacological potential, anti-tumor, antimicrobial, and acetylcholinesterase inhibitory activity of marine-derivedBacillus velezensisAG6 exopolysaccharide
Source: Royal Society of Chemistry journal article supplement (doi:10.1039/d3ra04009g), 2023-01-01
Supplement: d3ra04009g1.pdf [file d3ra04009g1.pdf]

## Supplementary Data

### **In-vitro studies on the pharmacological potential, anti-tumor, antimicrobial, and acetylcholinesterase inhibitory activity of marine-derived *Bacillus velezensis* AG6 exopolysaccharide**

**Table S1.** Culture and Morphological Characteristics of *Bacillus velezensis* strain AG6

| <i>Bacillus velezensis</i> | Shape and Culture Characteristics                                                                                                                                                     |
|----------------------------|---------------------------------------------------------------------------------------------------------------------------------------------------------------------------------------|
| Strain AG6                 | Gram positive Rod, irregular large colony, pale yellow, Rough Colony texture, Dull Colony surface, Convex, , Flat Elevation, non-capsulated, spore forming, non-motile, non-acid fast |

**Table S2.** Physiological and biochemical Characteristics of *Bacillus velezensis* strain AG6.

| Physiological characteristics | <i>Bacillus velezensis</i> strain AG6 |
|-------------------------------|---------------------------------------|
| Catalase                      | +                                     |
| Citrate                       | +                                     |
| Coagulase                     | -                                     |
| Indol                         | -                                     |
| MR(Methylred)                 | -                                     |
| VP (Voges proskauer)          | +                                     |
| Oxidase                       | -                                     |
| H <sub>2</sub> S              | -                                     |
| Urease                        | +                                     |
| Nitrate reduction             | +                                     |
| Glucose                       | +                                     |
| Lactose                       | +                                     |
| Sucrose                       | -                                     |
| Mannose                       | -                                     |

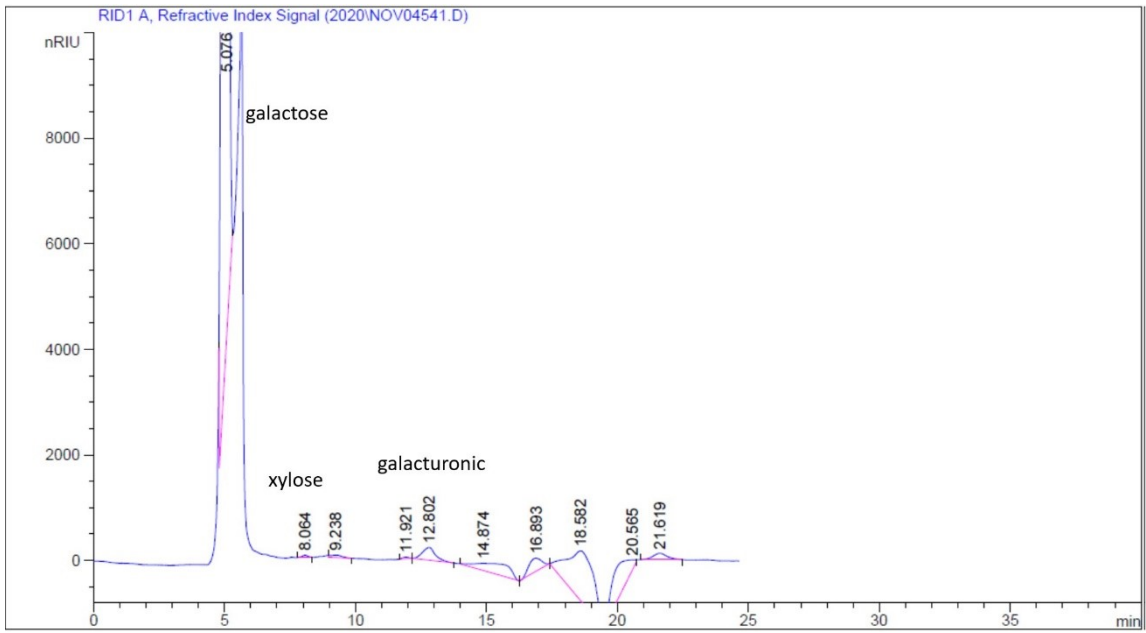

**Figure S1.** HPLC analysis of the EPSF6 from *Bacillus velezensis* strain AG6

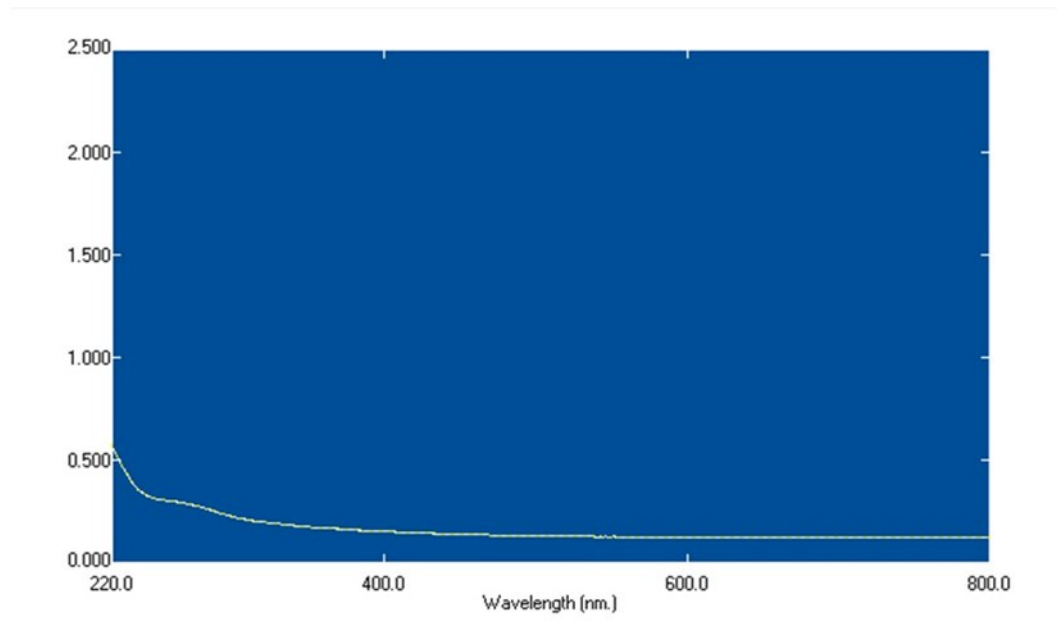

**Figure S2.** U.V. Spectrum of EPSF6 isolated from *Bacillus velezensis* strain AG6.

### Antioxidant Control (Ascorbic Acid)

**Table S3.** The ability of ascorbic acid to scavenge DPPH free radicals over different time intervals

| Concentration (µg/mL) | DPPH       | H <sub>2</sub> O <sub>2</sub> | ABTS       |
|-----------------------|------------|-------------------------------|------------|
| 20                    | 61.47±1.02 | 55.78±1.12                    | 64.96±1.24 |
| 40                    | 82.16±1.92 | 70.34±1.73                    | 83.64±1.11 |
| 60                    | 91.59±1.10 | 84.62±1.13                    | 90.27±0.83 |
| 80                    | 97.10±0.87 | 92.40±0.96                    | 95.68±1.64 |
| 100                   | 99.13±1.45 | 97.58±1.05                    | 99.14±1.39 |
| IC <sub>50</sub>      | 86.44±1.42 | 88.71±0.98                    | 87.50±0.75 |

### Antitumor Control (Cisplatin)

**Table S4.** Cisplatin IC<sub>50</sub> against different cancerous cell lines

| Cell line | Cisplatin IC <sub>50</sub> (µg/ml) | S.D. (±) |
|-----------|------------------------------------|----------|
| HepG-2    | 1.29                               | 0.17     |
| A-549     | 4.08                               | 0.46     |
| HCT-116   | 2.36                               | 0.32     |
| HEp-2     | 4.21                               | 0.19     |
| PC-3      | 3.79                               | 0.35     |
| MCF-7     | 3.41                               | 0.25     |

### Anti-inflammatory 5-LOX control (ibuprofen)

**Table S5.** The inhibitory activity of ibuprofen against 5-LOX enzymatic activity.

| conc. (µg/ ml)   | Mean of LOX inhibitory% |
|------------------|-------------------------|
| 125              | 100.00                  |
| 62.5             | 100.00                  |
| 31.25            | 100.00                  |
| 15.63            | 89.21 ±1.2              |
| 7.81             | 78.34 ±0.92             |
| 3.9              | 70.12 ±2.1              |
| 1.95             | 57.32 ±1.3              |
| 0.98             | 42.16 ±0.63             |
| 0                | 0                       |
| IC <sub>50</sub> | 1.5±1.3                 |

### Anti-inflammatory COX-2 control (celecoxib)

**Table S6.** The inhibitory activity of celecoxib against COX-2 enzymatic activity.

| conc. ( $\mu\text{g/ ml}$ ) | Mean of LOX inhibitory% |
|-----------------------------|-------------------------|
| 31.25                       | 100                     |
| 15.63                       | 100                     |
| 7.81                        | 100                     |
| 3.9                         | 100                     |
| 1.95                        | 82.15                   |
| 0.98                        | 66.34                   |
| 0.49                        | 52.72                   |
| 0.24                        | 49.35                   |
| 0.12                        | 19.35                   |
| 0                           | 0.00                    |
| IC <sub>50</sub>            | 0.28 $\pm$ 1.7          |

**Table S7.** The inhibitory activity of Eserine against acetylcholinesterase activity.

| Conc. ( $\mu\text{g/ ml}$ ) | Activity (%)              |
|-----------------------------|---------------------------|
| 0.02                        | 15.09 $\pm$ 1.02          |
| 0.04                        | 26.67 $\pm$ 1.36          |
| 0.06                        | 37.11 $\pm$ 1.15          |
| 0.08                        | 45.92 $\pm$ 1.08          |
| 0.1                         | 55.36 $\pm$ 1.14          |
| 0.12                        | 64.78 $\pm$ 1.20          |
| IC <sub>50</sub>            | 0.09( $\mu\text{g/ ml}$ ) |
